# Supplementary material
Source: publisher site journal article supplement (https://www.dovepress.com/article/576861)
Supplement: Supplementary file 1 [file 576861%20Revised%20Appendix%201.docxs]

**Appendix 1 – Data Collection form**

**Research Code: ______________________**

**Part 1: Patients’ demographic and characteristics**

**Age (in years): ____________**

**Gender**  Male  Female

**Ethnicity**

Arab White/Caucasian (European descent) Black (African heritage)

South Asian (Indian subcontinent) Southeast and West Asian (Chinese descent) Other

**Mental Health diagnosis**

Anxiety disorders Learning Disability Bipolar affective disorder

Depression Dissociation and dissociative disorders Eating disorders

Obsessive compulsive disorder Post-traumatic stress disorder Schizophrenia

Alcohol/ Substance use disorder Others (Gender dysphoria, Personality disorder, suicidal thoughts, and others)

**Language**

English Hindi Urdu Tamil Malayalam Arabic Others

**Duration of admission:**  Chronic (>3months) ; Acute ( within 2 weeks) Intermediate stay (2w-3m)

**Multiple admission:** Multiple Admission (> 3 admission in a year) first admissionto MHS

### Part 2: Documenter

**Discipline**

Physician Clinical Pharmacist Dietitian Occupational therapist Physiotherapist Case manager Social worker Psychologist Nurses Student (Specify the discipline: __)

**Professional Level** (for doctors only): Resident Specialist/Fellow Consultant/Sr. Consultant

**Specialty:**  Adult Psychiatry Geriatric Child and adolescents Forensic Learning Disability Community Women wellness

### Part 3: Language Appropriateness

**Negative Language Categories** (Insert an example from the chart for the selected category)

- Disability Language/ Disorder-first Language
- Disapproval/ Questioning Credibility
- Stereotyping
- Inappropriate medication-related Language

**Positive Language Categories** (Insert an example from the chart for the selected category)

- Person-first Language/Non-disabling Language
- Complimentary/ Approving Language
- Recovery/ Personalized Language
- Minimizing blame
- Bilateral decision making

**Supplementary: Language Categories Examples and definitions**

Category 1: Negative Language (with potentially stigmatizing consequences)

| Disability Language/  Disorder-first Language | The act of identifying the disability before the individual.  Using a diagnosis as an identifier/ descriptor of a patient’s characteristic | *- He is a 38-year-old schizophrenic*  *- Patient is suffering from bipolar disorder* (“*suffers*” implies being a “*victim*” which is considered derogatory or experiencing disability).  *- Wheelchair-bound (describes the patient with his disability)*  *- Known case of … (describes the patient as a case rather than a person)*  *- Addiction* |
| --- | --- | --- |
| Disapproval/  Questioning Credibility | Highlights poor reasoning, decision making, or self-care, usually in a way that  conveys the patient is unreasonable.  Implies disbelief of patient reports of their own experience or behaviors | *- The patient “abuses” alcohol (*denotes disapproval, preferred: *“misuse”)*  *- He claims that nicotine patches don’t work for him.*  *- Patient refused… [if used without inclusion of reason] (Implies poor reasoning)* |
| Stereotyping | The use of derogatory descriptors,  or the use of outdated terms that perpetuate negative stereotypes by  utilization of disability-focused language.  Language suggesting that  the physician is annoyed | *- He is a difficult/dangerous patient*  *- She is handicapped, crippled* (preferred: *“has a disability”*)  *- He is manageable / under control* |
| Inappropriate treatment and medication-related Language | Referring to “drugs” can be linked to substance misuse.  Paternalistic description around medication-taking behavior  Language that emphasizes physician authority over patient  Inappropriate terminology for describing the mechanism of action of a medication or use of brand/trade/commercial names of medications | *- The patient is taking psychiatric drugs* (preferred: “*medicines*” or “*pharmacotherapy*”)  *- She was admitted because of non-compliance with treatment* (“*non-compliance*” implies the patient plays a passive role in the process of taking medication; preferred: “*adherent*” which is collaborative, and the patient takes an active role in taking medication)  *- She was told to discontinue the antipsychotic immediately*  *- He was given a tranquilizer (*preferred: *“sedative”), sleeping pill (*preferred*: “hypnotic/sedative”, Prozac (*preferred: *“fluoxetine”)* |

Category 2: Positive Language (potentially contributes to recovery, health and wellbeing)

| Person-first Language/  Non-disabling Language | Puts the person before the disability and describes what a person has, not what a person is | *- The patient has a substance use disorder.*  *- He was diagnosed with bipolar disorder when he was 20 years old* |
| --- | --- | --- |
| Complimentary/ Approving Language | Explicit adjectives to describe  patient positively  Highlighting patient knowledge,  character, reasoning skills and self-care patient behaviors | - *Mr. X is pleasant and responds to questions appropriately*  *- She recognizes to have trouble remembering to take her medications* |
| Personalized Language | Uses the same words as the person does to describe themselves, their experience and their supports (using their words helps to build understanding and a respectful relationship).  **May include reports of patients but not collaterals** | *- Mrs. Y believes her faith is helping her to overcome her recent relapse*  *- She enjoys walking with her dog named Scout.*  *- The patient may need some support to help him making treatment decisions* |
| Minimizing blame | Reports reduced patient capacity or unhealthy behaviors with patient-centered reasons that convey understanding and minimize blame | - *She has not been able to check her lithium levels because she was out of the country.*  *- Ms. Y is having difficulty with her recommended medication* |
| Bilateral decision  making | References to the incorporation  of patient preferences into the  treatment plan | *- He does not want to add a medication so he agreed to increase the dose.*  *- I discussed with her the treatment options*  *-Patient understands and agrees* |

The framework above was developed based on existing literature and organizational guidelines/statements such as the AAPP (formerly CPNP) Communication style guide.1–8

1. Park J, Saha S, Chee B, Taylor J, Beach MC. Physician Use of Stigmatizing Language in Patient Medical Records. *JAMA Netw Open*. 2021;4(7):e2117052-e2117052. doi:10.1001/JAMANETWORKOPEN.2021.17052

2. American Association of Psychiatric Pharmacists. *Communication Style Guide*. 2018.

3. Martinelli TF, Meerkerk GJ, Nagelhout GE, et al. Language and stigmatization of individuals with mental health problems or substance addiction in the Netherlands: An experimental vignette study. *Health Soc Care Community*. 2020;28(5):1504-1513. doi:10.1111/hsc.12973

4. Jensen ME, Pease EA, Lambert K, et al. Championing person-first language: a call to psychiatric mental health nurses. *J Am Psychiatr Nurses Assoc*. 2013;19(3):146-151. doi:10.1177/1078390313489729

5. *Recovery Oriented Language Guide - WORDS MATTER*. 2022.

6. Person-first and Destigmatizing Language | National Institutes of Health (NIH). May 18, 2023. Accessed June 30, 2023. https://www.nih.gov/nih-style-guide/person-first-destigmatizing-language

7. Raney J, Pal R, Lee T, et al. Words Matter: An Antibias Workshop for Health Care Professionals to Reduce Stigmatizing Language. *MedEdPORTAL*. 2021;17:11115. doi:10.15766/MEP_2374-8265.11115

8. Granello DH, Gibbs TA. The Power of Language and Labels: “the Mentally Ill” Versus “people with Mental Illnesses.” *Journal of Counseling and Development*. 2016;94(1):31-40. doi:10.1002/JCAD.12059
